# Supplementary material
Source: Springer Nature journal article supplement (https://www.springermedizin.de/resource/supplementary/13049_2010_248_MOESM6_ESM.pdf/9666100)

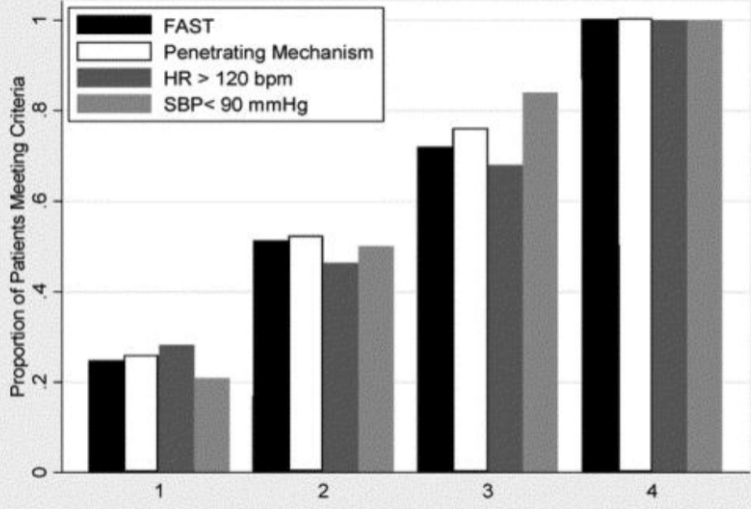

**ABC Score**

Supplement: MOESM6 [file 9666100]
